# Supplementary material
Source: publisher figshare collection journal article supplement (https://karger.figshare.com/articles/dataset/_/5951824)
Supplement: Supplementary file 2 [file 1]

**Supplementary table 3** List of M protein sequences shown in Figures 1 and 2, and corresponding sequences with identical M protein sequence

| <b>Virus</b>                  | <b>Identical M protein sequence</b>                                                                                                                                                                                                                                                                                                                                                                                                                                                                                                                                 |
|-------------------------------|---------------------------------------------------------------------------------------------------------------------------------------------------------------------------------------------------------------------------------------------------------------------------------------------------------------------------------------------------------------------------------------------------------------------------------------------------------------------------------------------------------------------------------------------------------------------|
| <b>HPIV1</b>                  |                                                                                                                                                                                                                                                                                                                                                                                                                                                                                                                                                                     |
| HPIV1s/Zagreb.HR/13.16(909)   |                                                                                                                                                                                                                                                                                                                                                                                                                                                                                                                                                                     |
| HPIV1s/Zagreb.HR/49.15(1874)  |                                                                                                                                                                                                                                                                                                                                                                                                                                                                                                                                                                     |
| HPIV1s/Zagreb.HR/3.12(1020)   | HPIV1s/Zagreb.HR/49.15(1866),<br>HPIV1s/Zagreb.HR/49.15(1842),<br>HPIV1s/Zagreb.HR/49.15(1850),<br>HPIV1s/Zagreb.HR/3.12(1022),<br>HPIV1s/Zagreb.HR/44.13(1564),<br>HPIV1s/Zagreb.HR/4.16(203),<br>HPIV1s/Zagreb.HR/50.11(19069),<br>HPIV1s/Zagreb.HR/44.15(1669),<br>HPIV1s/Zagreb.HR/1.12(266),<br>HPIV1s/Zagreb.HR/8.12(2000),<br>HPIV1s/Zagreb.HR/46.15(1710),<br>HPIV1s/Zagreb.HR/3.16(115),<br>HPIV1s/Zagreb.HR/47.13(1469),<br>HPIV1s/Zagreb.HR/48.15(1828),<br>HPIV1s/Zagreb.HR/50.13(1833),<br>HPIV1s/Zagreb.HR/1.16(30),<br>HPIV1s/Zagreb.HR/21.11(10300) |
| HPIV1s/Zagreb.HR/46.13(1643)  |                                                                                                                                                                                                                                                                                                                                                                                                                                                                                                                                                                     |
| HPIV1s/Zagreb.HR/51.11(19282) |                                                                                                                                                                                                                                                                                                                                                                                                                                                                                                                                                                     |
| HPIV1s/Zagreb.HR/38.11(14501) |                                                                                                                                                                                                                                                                                                                                                                                                                                                                                                                                                                     |
| HPIV1s/Zagreb.HR/40.11(15425) |                                                                                                                                                                                                                                                                                                                                                                                                                                                                                                                                                                     |
| HPIV1s/Zagreb.HR/49.11(18789) | HPIV1s/Zagreb.HR/48.11(18494)                                                                                                                                                                                                                                                                                                                                                                                                                                                                                                                                       |
| HPIV1s/Zagreb.HR/3.14(65)     |                                                                                                                                                                                                                                                                                                                                                                                                                                                                                                                                                                     |
| HPIV1s/Zagreb.HR/47.13(1712)  |                                                                                                                                                                                                                                                                                                                                                                                                                                                                                                                                                                     |
| HPIV1s/Zagreb.HR/47.12(3225)  |                                                                                                                                                                                                                                                                                                                                                                                                                                                                                                                                                                     |
| <b>HPIV2</b>                  |                                                                                                                                                                                                                                                                                                                                                                                                                                                                                                                                                                     |
| HPIV2i/Zagreb.HR/50.12(3263)  |                                                                                                                                                                                                                                                                                                                                                                                                                                                                                                                                                                     |
| HPIV2i/Zagreb.HR/49.11(17034) |                                                                                                                                                                                                                                                                                                                                                                                                                                                                                                                                                                     |
| HPIV2i/Zagreb.HR/41.12(2950)  |                                                                                                                                                                                                                                                                                                                                                                                                                                                                                                                                                                     |
| HPIV2i/Zagreb.HR/49.15(1849)  |                                                                                                                                                                                                                                                                                                                                                                                                                                                                                                                                                                     |
| HPIV2i/Zagreb.HR/47.11(16406) |                                                                                                                                                                                                                                                                                                                                                                                                                                                                                                                                                                     |
| HPIV2i/Zagreb.HR/49.11(16971) |                                                                                                                                                                                                                                                                                                                                                                                                                                                                                                                                                                     |
| HPIV2i/Zagreb.HR/28.12(2706)  | HPIV2i/Zagreb.HR/38.12(2858),<br>HPIV2i/Zagreb.HR/44.12(3036),<br>HPIV2i/Zagreb.HR/50.12(3257),<br>HPIV2i/Zagreb.HR/51.12(3316),<br>HPIV2i/Zagreb.HR/47.11(16475)                                                                                                                                                                                                                                                                                                                                                                                                   |
| HPIV2i/Zagreb.HR/47.15(1779)  | HPIV2i/Zagreb.HR/47.14(1688)                                                                                                                                                                                                                                                                                                                                                                                                                                                                                                                                        |
| <b>HPIV3</b>                  |                                                                                                                                                                                                                                                                                                                                                                                                                                                                                                                                                                     |
| HPIV3s/Zagreb.HR/19.12(2501)  |                                                                                                                                                                                                                                                                                                                                                                                                                                                                                                                                                                     |
| HPIV3s/Zagreb.HR/44.12(3108)  | HPIV3s/Zagreb.HR/48.12(3266)                                                                                                                                                                                                                                                                                                                                                                                                                                                                                                                                        |
| HPIV3s/Zagreb.HR/40.12(2999)  |                                                                                                                                                                                                                                                                                                                                                                                                                                                                                                                                                                     |
| HPIV3s/Zagreb.HR/22.16(1416)  |                                                                                                                                                                                                                                                                                                                                                                                                                                                                                                                                                                     |
| HPIV3s/Zagreb.HR/21.16(1332)  |                                                                                                                                                                                                                                                                                                                                                                                                                                                                                                                                                                     |

|                              |                                                                                                                                                                                                                                 |
|------------------------------|---------------------------------------------------------------------------------------------------------------------------------------------------------------------------------------------------------------------------------|
| HPIV3s/Zagreb.HR/8.14(346)   | HPIV3s/Zagreb.HR/8.14(420)                                                                                                                                                                                                      |
| HPIV3s/Zagreb.HR/20.12(2547) | HPIV3s/Zagreb.HR/6.15(338),<br>HPIV3s/Zagreb.HR/18.11(9484),<br>HPIV3s/Zagreb.HR/46.13(1650),<br>HPIV3s/Zagreb.HR/51.12(3379),<br>HPIV3s/Zagreb.HR/20.16(1277),<br>HPIV3s/Zagreb.HR/46.13(1651),<br>HPIV3s/Zagreb.HR/13.16(892) |
| HPIV3s/Zagreb.HR/19.11(9935) | HPIV3s/Zagreb.HR/8.14(390),<br>HPIV3s/Zagreb.HR/14.11(8322)                                                                                                                                                                     |
| HPIV3s/Zagreb.HR/10.11(6622) |                                                                                                                                                                                                                                 |
| HPIV3s/Zagreb.HR/22.16(1424) |                                                                                                                                                                                                                                 |
| <b>HMPV</b>                  |                                                                                                                                                                                                                                 |
| HR397-15                     | HR900-15, HR2152-12, HR1211-15, HR1127-15, HR1806-12, HR898-15, HR18673-11, HR10432-11, HR361-16                                                                                                                                |
| HR1763-15                    |                                                                                                                                                                                                                                 |
| HR689-14                     |                                                                                                                                                                                                                                 |
| HR1105-15                    | HR9722-11, HR439-15, HR19598-11, HR1935-15, HR809-16, HR899-15, HR1128-15, HR505-16, HR347-12, HR754-15, HR857-15, HR856-15                                                                                                     |
| HR1252-16                    | HR475-13, HR337-14, HR1311-16, HR1659-13, HR920-14, HR89-12, HR903-16, HR547-15, HR18786-11, HR124-12, HR175-16, HR1202-15, HR93-12, HR22-11, HR894-15, HR997-15, HR1988-15, HR1103-15                                          |
| <b>HRSV</b>                  |                                                                                                                                                                                                                                 |
| HR450-14                     |                                                                                                                                                                                                                                 |
| HR137-14                     | HR492-14, HR6808-11, HR1881-12, HR189-14, HR518-12, HR887-14, HR74-14, HR331-15, HR560-14, HR6282-07, HR586-13, HR14603-06                                                                                                      |
| HR7226-11                    |                                                                                                                                                                                                                                 |
| HR879-07                     |                                                                                                                                                                                                                                 |
| HR196-14                     | HR3330-12, HR1973-13                                                                                                                                                                                                            |
| HR266-14                     | HR2117-12, HR131-15, HR19501-08, HR545-13, HR8934-11, HR6010-07, HR307-14, HR18945-08, HR771-15, HR3242-12, HR814-14, HR1890-15, HR1904-12, HR2672-07, HR544-14, HR197-15, HR248-13, HR6855-08                                  |
| HR2153-12                    | HR949-14, HR3386-12                                                                                                                                                                                                             |
