# Supplementary material
Source: publisher figshare collection journal article supplement (https://karger.figshare.com/articles/dataset/_/5951824)
Supplement: Supplementary file 3 [file 1]

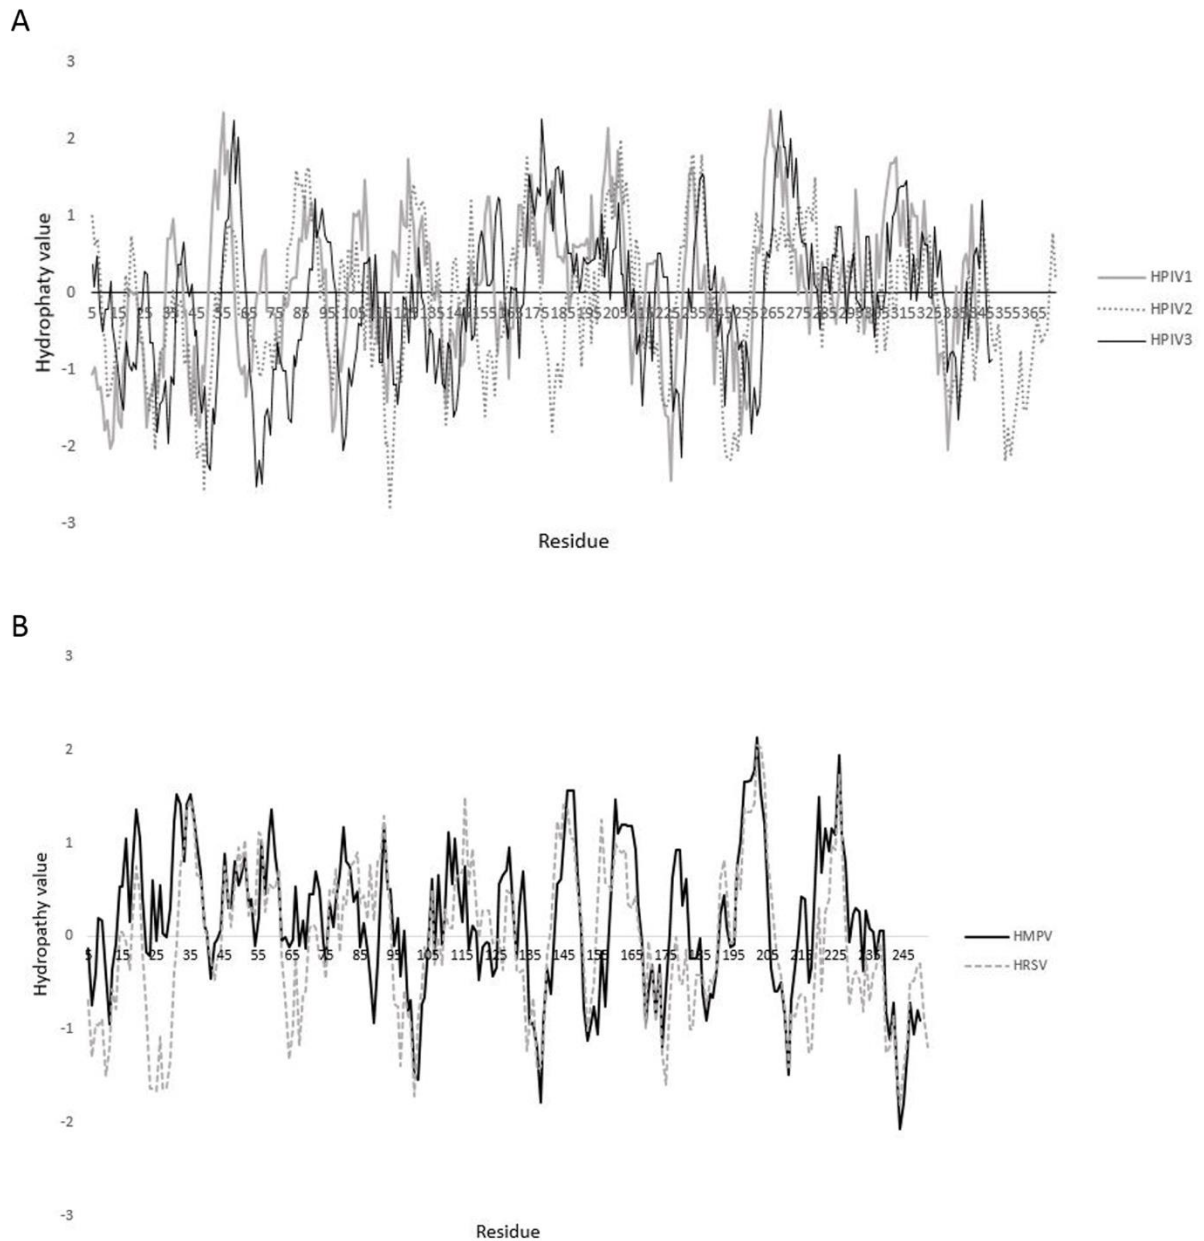

**Supplementary figure 2** Kyte-Doolittle hydrophobicity plot of M proteins generated for HPIV1-3 strains (a), and HMPV and HRSV strains (b). Plot was created using the ExPASy ProtScale tool (<http://web.expasy.org/protscale>), with a window size of 9
