# Supplementary material
Source: publisher figshare collection journal article supplement (https://karger.figshare.com/articles/dataset/_/5951824)
Supplement: Supplementary file 4 [file 1]

**Supplementary table 2** List of accession numbers of strains sequenced in this study, with corresponding accession numbers of glycoprotein genes.

| <b>HPIV1</b>                  | <b>M gene</b> | <b>HN gene</b> |                |
|-------------------------------|---------------|----------------|----------------|
| HPIV1s/Zagreb.HR/38.11(14501) | MF166662      | KT336331       |                |
| HPIV1s/Zagreb.HR/47.13(1712)  | MF166650      | KT336347       |                |
| HPIV1s/Zagreb.HR/49.15(1866)  | MF166636      | MF177507       |                |
| HPIV1s/Zagreb.HR/50.11(19069) | MF166657      | KT336338       |                |
| HPIV1s/Zagreb.HR/49.11(18789) | MF166651      | KT336337       |                |
| HPIV1s/Zagreb.HR/48.15(1828)  | MF166663      | MF177508       |                |
| HPIV1s/Zagreb.HR/46.13(1643)  | MF166655      | KT336349       |                |
| HPIV1s/Zagreb.HR/49.15(1842)  | MF166646      | MF177509       |                |
| HPIV1s/Zagreb.HR/44.13(1564)  | MF166652      | KT336345       |                |
| HPIV1s/Zagreb.HR/49.15(1850)  | MF166647      |                |                |
| HPIV1s/Zagreb.HR/50.13(1833)  | MF166638      | KT336350       |                |
| HPIV1s/Zagreb.HR/47.12(3225)  | MF166635      | KT336344       |                |
| HPIV1s/Zagreb.HR/21.11(10300) | MF166649      |                |                |
| HPIV1s/Zagreb.HR/47.13(1469)  | MF166639      |                |                |
| HPIV1s/Zagreb.HR/1.16(30)     | MF166642      | MF177510       |                |
| HPIV1s/Zagreb.HR/40.11(15425) | MF166659      | KT336332       |                |
| HPIV1s/Zagreb.HR/8.12(2000)   | MF166656      | KT336343       |                |
| HPIV1s/Zagreb.HR/48.11(18494) | MF166645      | KT336336       |                |
| HPIV1s/Zagreb.HR/51.11(19282) | MF166643      | KT336351       |                |
| HPIV1s/Zagreb.HR/46.15(1710)  | MF166641      | MF177511       |                |
| HPIV1s/Zagreb.HR/49.15(1874)  | MF166640      | MF177512       |                |
| HPIV1s/Zagreb.HR/3.12(1020)   | MF166660      | KT336341       |                |
| HPIV1s/Zagreb.HR/3.16(115)    | MF166644      | MF177513       |                |
| HPIV1s/Zagreb.HR/4.16(203)    | MF166653      | MF177514       |                |
| HPIV1s/Zagreb.HR/1.12(266)    | MF166658      | KT336340       |                |
| HPIV1s/Zagreb.HR/13.16(909)   | MF166654      | MF177515       |                |
| HPIV1s/Zagreb.HR/3.12(1022)   | MF166648      | KT336342       |                |
| HPIV1s/Zagreb.HR/44.15(1669)  | MF166661      | MF177516       |                |
| HPIV1s/Zagreb.HR/3.14(65)     | MF166637      | KT336348       |                |
|                               |               |                |                |
| <b>HPIV2</b>                  | <b>M gene</b> | <b>F gene</b>  | <b>HN gene</b> |
| HPIV2i/Zagreb.HR/47.11(16406) | MF133335      | KT315655       | KT315655       |
| HPIV2i/Zagreb.HR/47.11(16475) | MF133336      | KT315656       | KT315656       |
| HPIV2i/Zagreb.HR/49.11(16971) | MF133337      | KT315658       | KT315658       |
| HPIV2i/Zagreb.HR/49.11(17034) | MF133338      | KT315659       | KT315659       |
| HPIV2i/Zagreb.HR/28.12(2706)  | MF133339      | KT315660       | KT315660       |
| HPIV2i/Zagreb.HR/38.12(2858)  | MF133340      | KT315661       | KT315661       |
| HPIV2i/Zagreb.HR/41.12(2950)  | MF133341      | KT315662       | KT315662       |
| HPIV2i/Zagreb.HR/50.12(3257)  | MF133342      | KT315663       | KT315663       |
| HPIV2i/Zagreb.HR/50.12(3263)  | MF133343      | KT315664       | KT315664       |
| HPIV2i/Zagreb.HR/51.12(3316)  | MF133344      | KT315665       | KT315665       |
| HPIV2i/Zagreb.HR/47.14(1688)  | MF133345      | KT315667       | KT315667       |
| HPIV2i/Zagreb.HR/44.12(3036)  | MF133346      | KT595234       | KT595234       |
| HPIV2i/Zagreb.HR/47.15(1779)  | MF133347      | MF163150       | MF163150       |
| HPIV2i/Zagreb.HR/49.15(1849)  | MF133348      | MF163151       | MF163151       |
|                               |               |                |                |
| <b>HPIV3</b>                  | <b>M gene</b> | <b>HN gene</b> |                |
| HPIV3s/Zagreb.HR/51.12(3379)  | MF166670      | KX467895       |                |
| HPIV3s/Zagreb.HR/48.12(3266)  | MF166669      | KX467894       |                |

|                              |          |          |
|------------------------------|----------|----------|
| HPIV3s/Zagreb.HR/22.16(1424) | MF166684 |          |
| HPIV3s/Zagreb.HR/8.14(390)   | MF166673 | KX467898 |
| HPIV3s/Zagreb.HR/44.12(3108) | MF166668 | KX467893 |
| HPIV3s/Zagreb.HR/20.16(1277) | MF166681 |          |
| HPIV3s/Zagreb.HR/6.15(338)   | MF166679 |          |
| HPIV3s/Zagreb.HR/46.13(1650) | MF166671 | KX467896 |
| HPIV3s/Zagreb.HR/40.12(2999) | MF166677 | KX467902 |
| HPIV3s/Zagreb.HR/14.11(8322) | MF166665 | KX467886 |
| HPIV3s/Zagreb.HR/18.11(9484) | MF166676 | KX467901 |
| HPIV3s/Zagreb.HR/13.16(892)  | MF166680 |          |
| HPIV3s/Zagreb.HR/46.13(1651) | MF166678 | KX467903 |
| HPIV3s/Zagreb.HR/8.14(346)   | MF166672 | KX467897 |
| HPIV3s/Zagreb.HR/22.16(1416) | MF166683 |          |
| HPIV3s/Zagreb.HR/19.11(9935) | MF166675 | KX467900 |
| HPIV3s/Zagreb.HR/20.12(2547) | MF166667 | KX467892 |
| HPIV3s/Zagreb.HR/21.16(1332) | MF166682 |          |
| HPIV3s/Zagreb.HR/19.12(2501) | MF166666 | KX467891 |
| HPIV3s/Zagreb.HR/10.11(6622) | MF166664 | KX467885 |
| HPIV3s/Zagreb.HR/8.14(420)   | MF166674 | KX467899 |

| HMPV       | M gene   | F gene     |
|------------|----------|------------|
| HR900-15   | MF104588 | KX497055   |
| HR1202-15  | MF104589 | KX497059.1 |
| HR18786-11 | MF104590 | KT371632.1 |
| HR439-15   | MF104591 | KX497052   |
| HR920-14   | MF104592 | KX497049.1 |
| HR1103-15  | MF104593 | KX497052.1 |
| HR809-16   | MF104594 | MF104561   |
| HR175-16   | MF104595 | MF104586   |
| HR1659-13  | MF104596 | KT371672.1 |
| HR2152-12  | MF104597 | KT371668.1 |
| HR1252-16  | MF104598 | MF104564   |
| HR1806-12  | MF104599 | KT371658.1 |
| HR898-16   | MF104600 | MF104576   |
| HR397-15   | MF104601 | KX497051.1 |
| HR1211-15  | MF104602 | KX497061.1 |
| HR18673-11 | MF104603 | KT371631.1 |
| HR89-12    | MF104604 | KT371644.1 |
| HR124-12   | MF104605 | KT371646.1 |
| HR547-15   | MF104606 | KX497053.1 |
| HR1311-16  | MF104607 | MF104578   |
| HR9722-11  | MF104608 | KT371612.1 |
| HR689-14   | MF104609 | KX497048.1 |
| HR475-13   | MF104610 | KT371671.1 |
| HR1105-15  | MF104611 | KX497058.1 |
| HR347-12   | MF104612 | KT371650.1 |
| HR10432-11 | MF104613 | KT371614.1 |
| HR1763-15  | MF104614 | KX497064.1 |
| HR337-14   | MF104615 | KT371677.1 |
| HR93-12    | MF104616 | KT371645.1 |
| HR19598-11 | MF104617 | KT371639.1 |
| HR1128-15  | MF104618 | KX497052   |

|           |          |            |
|-----------|----------|------------|
| HR361-16  | MF104619 | MF104572   |
| HR1935-15 | MF104620 | KX497062.1 |
| HR899-15  | MF104621 | MF166864   |
| HR505-16  | MF104622 | MF104573   |
| HR1127-15 | MF104623 | KX497056.1 |
| HR903-16  | MF104624 | MF104585   |

| HRSV       | M gene   | G gene     |
|------------|----------|------------|
| HR278-13   | MF104625 | KF057866   |
| HR2672-07  | MF104626 | MF166865   |
| HR771-15   | MF104627 | KX497086   |
| HR197-15   | MF104628 | KX497092.1 |
| HR94-14    | MF104629 | KT371571   |
| HR131-15   | MF104630 | KX497088.1 |
| HR2095-12  | MF104631 | KT371681   |
| HR6010-07  | MF104632 | JQ844866.1 |
| HR18945-08 | MF104633 | MF166866   |
| HR19501-08 | MF104634 | JQ844863.1 |
| HR814-14   | MF104635 | KX497089.1 |
| HR196-14   | MF104636 | KT371694.1 |
| HR544-14   | MF104637 | KX497091.1 |
| HR6855-08  | MF104638 | MF166867   |
| HR545-13   | MF104639 | KJ173833.1 |
| HR1973-13  | MF104640 | KT371693.1 |
| HR2028-12  | MF104641 | KT371548.1 |
| HR450-14   | MF104642 | KT371609.1 |
| HR1904-12  | MF104643 | KT371545.1 |
| HR3436-12  | MF104644 | KT371684.1 |
| HR3242-12  | MF104645 | KU375585.1 |
| HR2117-12  | MF104646 | KT371682.1 |
| HR266-14   | MF104647 | KT371703.1 |
| HR248-13   | MF104648 | KT371575.1 |
| HR307-14   | MF104649 | MF166870   |
| HR8934-11  | MF104650 | KT371540.1 |
| HR226-14   | MF104651 | KT371699.1 |
| HR3330-12  | MF104652 | KT371683.1 |
| HR1890-15  | MF104653 | KX497093.1 |
| HR887-14   | MF104654 | KX497130.1 |
| HR6282-07  | MF104655 | JQ844868.1 |
| HR331-15   | MF104656 | KX497109.1 |
| HR1881-12  | MF104657 | KT371578.1 |
| HR586-13   | MF104658 | KT371591.1 |
| HR14603-06 | MF104659 | MF166868   |
| HR560-14   | MF104660 | KX497095.1 |
| HR144-13   | MF104661 | KJ173834.1 |
| HR6808-11  | MF104662 | KT371583.1 |
| HR189-14   | MF104663 | KT371592.1 |
| HR7226-11  | MF104664 | KT371582.1 |
| HR949-14   | MF104665 | KX497122.1 |
| HR879-07   | MF104666 | MF166869   |
| HR3386-12  | MF104667 | KT371587.1 |
| HR74-14    | MF104668 | KT371599.1 |

|           |          |            |
|-----------|----------|------------|
| HR137-14  | MF104669 | KT371600.1 |
| HR2153-12 | MF104670 | KT371586.1 |
| HR492-14  | MF104671 | KT371595.1 |
