# Supplementary material
Source: publisher figshare collection journal article supplement (https://karger.figshare.com/articles/dataset/_/5951824)
Supplement: Supplementary file 5 [file 1]

**Supplementary table 1** Primer sets used for amplification and sequencing of the full-length M genes with corresponding PCR procedure

| Name       | Oligonucleotide sequence (5'-3') | Polarity |
|------------|----------------------------------|----------|
| HPIV1 2694 | AGAACAACCACAACCACAG              | +        |
| HPIV1 5892 | CAGTTCCTTAACCTGTTTCAGTG          | -        |
| HPIV1 3571 | CCAGCAATCAAAATCAATATC            | +        |
| HPIV1 4868 | GGCTGGGCTTTTTGAGACTCT            | -        |
| HPIV2 M1   | AGAAGGCTGGACATGATA               | +        |
| HPIV2 M2   | TCTGCATTGTAGGATTTC               | -        |
| HPIV2 M3   | AGACCTATCCTTAAGTTCA              | +        |
| HPIV2 M4   | TGCATACTATCATTGGATG              | -        |
| HPIV3 3436 | GAGCAGTACAATGAGATCACTAG          | +        |
| HPIV3 5922 | AAAGGGAGTCTGACTTGGAGAG           | -        |
| HPIV3 3448 | GAGATCACTAGTTGCAGTCA             | +        |
| HPIV3 4903 | CAGGTATGACTRCTGACRGTTG           | -        |
| HMPV M1    | CGARAGCACAAGYGGTGAATC            | +        |
| HMPV M2    | GCTTATTGCAGCTTCAACAGT            | -        |
| HMPV M3    | GAGYTCRGCCAAATCAGTT              | +        |
| HMPV M4    | ATCAYCACTTTCCAAGACAT             | -        |
| HRSV M1    | GACAATGATCTATCACTTGA             | +        |
| HRSV M2    | TTCACATARAGCAATGATSTCATG         | -        |
| HRSV M3    | GCATATGATGTAACYACACC             | +        |
| HRSV M4    | GGCCARAATTTGCTTGWGAAT            | -        |

The first PCR for the HPIV1 M gene (primers HPIV1 2694/HPIV1 5892) was carried out by 10 cycles at 94 °C for 30 s, followed by 51 °C for 30s and a final extension at 68 °C for 3 min and 40s, followed with additional 30 cycles at 94 °C for 30 s, 54 °C for 30s and 68 °C for 3 min and 40s. For nested PCR (primers HPIV1 3571/HPIV1 4868), 5 µL of the first PCR mixture was added to a 50 µL reaction mixture. PCR conditions for the second amplification were: 94 °C for 3 min, 40 cycles of 94 °C/30 s, 55 °C/30 s, 68 °C/1 min 30s.

The first PCR for the HPIV3 M gene (primers HPIV3 3436/HPIV3 5922) was carried out by 10 cycles at 94 °C for 30 s, 52 °C for 30s and 68 °C for 2 min 30s, followed by additional

30 cycles of 94 °C for 30 s, 54 °C for 30s and 68 °C for 2 min 30s. For nested PCR (primers HPIV3 3448/HPIV3 4903), 5 µL of the first PCR mixture was added to a 50 µL reaction mixture. PCR conditions for the second amplification were: 94°C for 3 min, 40 cycles of 94 °C/30 s, 55 °C/30 s, 68 °C/1 min 30s.

The PCR for the HPIV2 M gene was carried out in two fragments with primers pairs HPIV2 M1/M2 and M3/M4, respectively, each with 40 cycles at 94 °C for 30s, 50 °C for 20s and 68 °C for 2 min.

The PCR for the HMPV M gene was carried out in two fragments with primers pairs HMPV M1/M2 and M3/M4, respectively, each with 40 cycles at 95 °C for 30s, 50 °C for 30s and 68 °C for 2 min.

The PCR for the HMPV M gene was carried out in two fragments with primers pairs HRSV M1/M2 and M3/M4, respectively, each with 35 cycles at 95 °C for 30s, 53 °C (for primers M1/M2) or 53 °C (primers M3/M4) for 30s and 68 °C for 1 min.

For all reactions a final extension at 68°C for 10 min was included. Reaction mixtures contained 1×*OneTaq*® Standard Reaction Buffer (New England BioLabs, Ipswich, Massachusetts, USA), 10 mM dNTP, 0.25 mM MgCl<sub>2</sub>, 0.25 mM of each primer, and 1.25 U of *OneTaq* DNA polymerase (New England BioLabs, Ipswich, Massachusetts, USA).
